# Supplementary material for: Circulating mitochondrial DNA copy numbers represent a sensitive marker for diagnosis and monitoring of disease activity in systemic lupus erythematosus
Source: HighWire-hosted journal article supplement (doi:10.1136/rmdopen-2021-002010), 2021-12-01

## Circulating mtDNA in SLE

**Figure S1.** Diagram of the participants' study flow. mtDNA+ and mtDNA- correspond to mtDNA copy numbers above and below the calculated cut-off, respectively.

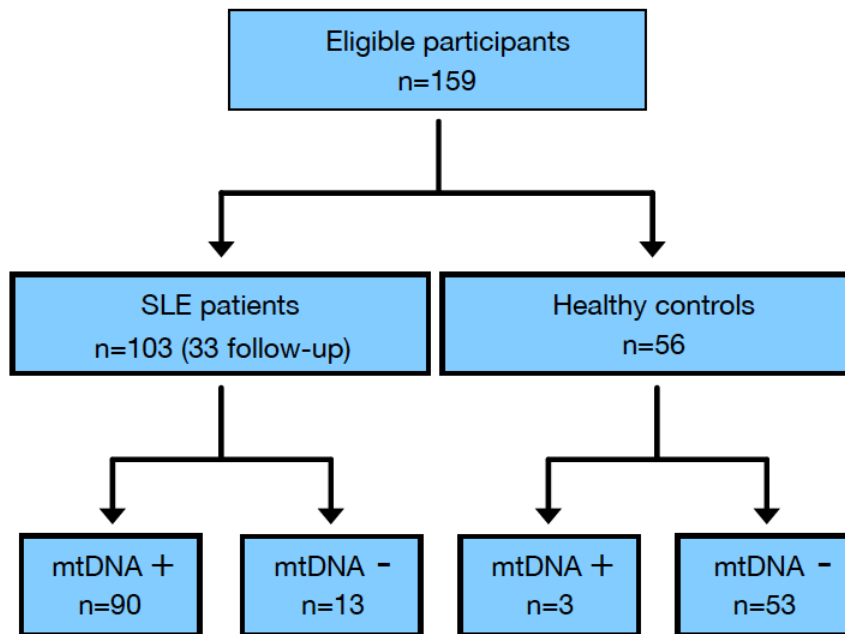

Supplement: rmdopen-2021-002010supp002_data_supplement.pdf [file rmdopen-2021-002010supp002_data_supplement.pdf]
