# Supplementary material for: Circulating mitochondrial DNA copy numbers represent a sensitive marker for diagnosis and monitoring of disease activity in systemic lupus erythematosus
Source: PubMed Central journal article supplement — RMD Open. 2021 Dec 16;7(3):e002010. doi: 10.1136/rmdopen-2021-002010 (PMC8679121; doi:10.1136/rmdopen-2021-002010), 2021-12-16
Supplement: rmdopen-2021-002010supp003.pdf [file rmdopen-2021-002010supp003.pdf]

## Circulating mtDNA in SLE

**Figure S2.** Confusion matrix depicting the performance of mtDNA copy number determination as a biomarker for reliable diagnostic assessment of SLE. Values of sensitivity, specificity, accuracy, precision and negative predictive value (NPV) are also included.

|                    |         | Test-based diagnosis     |                    |                            |
|--------------------|---------|--------------------------|--------------------|----------------------------|
|                    |         | SLE                      | healthy            |                            |
| Clinical diagnosis | SLE     | 90                       | 13                 | <b>Sensitivity</b><br>0.87 |
|                    | healthy | 3                        | 53                 | <b>Specificity</b><br>0.95 |
|                    |         | <b>Precision</b><br>0.97 | <b>NPV</b><br>0.80 | <b>Accuracy</b><br>0.90    |
